# Supplementary material for: The ionic strength dependent zeta potential at the surface of hexadecane droplets in water and the corresponding interfacial adsorption of surfactants
Source: Royal Society of Chemistry journal article supplement (doi:10.1039/c6sm02174c), 2016-12-19
Supplement: c6sm02174c1.pdf [file c6sm02174c1.pdf]

## Supporting Information

The ionic strength dependent zeta potential at the surface of hexadecane droplets in water and the corresponding interfacial adsorption of surfactants

*Fangyuan Yang<sup>a,b</sup>, Wei Wu<sup>a,b</sup>, Shunli Chen<sup>a</sup>, Wei Gan<sup>\*c,a</sup>*

- a. Laboratory of Environmental Science and Technology, The Xinjiang Technical Institute of Physics & Chemistry, Key Laboratory of Functional Materials and Devices for Special Environments, Chinese Academy of Sciences, Urumqi 830011, China
- b. University of Chinese Academy of Sciences, Beijing 100049, China
- c. Department of Natural Science and Humanities, Shenzhen Graduate School, Harbin Institute of Technology, University Town, Shenzhen 518055 China.

Corresponding Author \*Wei Gan, Email: [ganwei@hitsz.edu.cn](mailto:ganwei@hitsz.edu.cn)

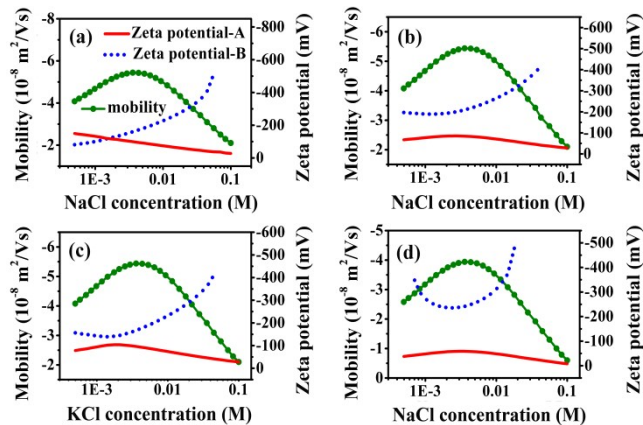

Figure S1. Mathematically allowed results of the zeta potential curves (solid and dotted lines) from calculation shown in section II and Figure 1 of the main text.

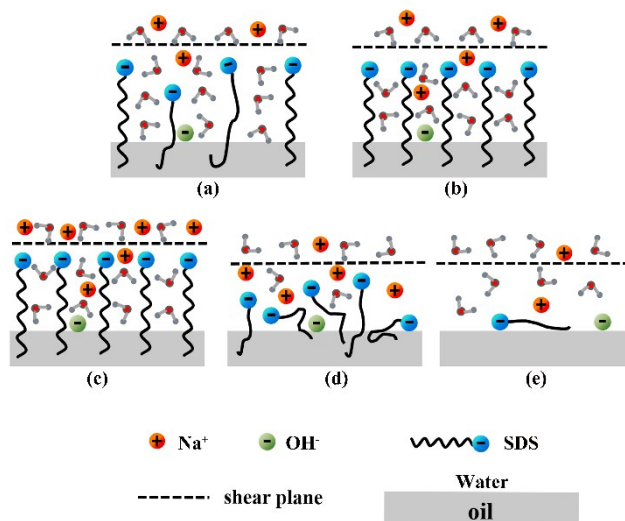

Figure S2. Illustration of the ionic distribution and possible water structure at the oil-water interface in the presence of 50  $\mu\text{M}$  SDS without NaCl (a), with NaCl at relatively low concentration (b), with NaCl at high concentration (c, d and e).
